# Supplementary material
Source: Research Square preprint supplement (doi:10.21203/rs.3.rs-9048333/v1)
Supplement: Supplementary file 1 [file 5636bdd7428ac650b067700b.docx]

**Table S1 Item analysis of the scale.**

| Item | CR | *P* | Cronbach’s α if item  deleted | Correlation coefficient with the total score | Retained or not |
| --- | --- | --- | --- | --- | --- |
| A1 | -17.05 | *P*＜0.001 | 0.917(↓) | 0.813** | retained |
| A2 | -7.52 | *P*＜0.001 | 0.921(↓) | 0.639** | retained |
| A3 | -7.47 | *P*＜0.001 | 0.921(↓) | 0.605** | retained |
| A4 | -11.04 | *P*＜0.001 | 0.917(↓) | 0.777** | retained |
| B1 | -6.89 | *P*＜0.001 | 0.921(↓) | 0.580** | retained |
| B2 | -6.79 | *P*＜0.001 | 0.921(↓) | 0.586** | retained |
| B3 | -7.71 | *P*＜0.001 | 0.920(↓) | 0.659** | retained |
| B4 | -13.89 | *P*＜0.001 | 0.919(↓) | 0.737** | retained |
| B5 | -4.97 | *P*＜0.001 | 0.923(↓) | 0.468** | retained |
| B6 | -4.73 | *P*＜0.001 | 0.923(↓) | 0.452** | retained |
| B7 | -7.09 | *P*＜0.001 | 0.922(↓) | 0.570** | retained |
| **B8** | -2.43 | *P*＜0.05 | 0.926(↑) | 0.214* | not retained |
| C1 | -5.97 | *P*＜0.001 | 0.921(↓) | 0.540** | retained |
| C2 | -9.29 | *P*＜0.001 | 0.920(↓) | 0.688** | retained |
| C3 | -5.74 | *P*＜0.001 | 0.922(↓) | 0.549** | retained |
| C4 | -11.36 | *P*＜0.001 | 0.918(↓) | 0.795** | retained |
| C5 | -7.09 | *P*＜0.001 | 0.921(↓) | 0.587** | retained |
| D1 | -7.52 | *P*＜0.001 | 0.920(↓) | 0.644** | retained |
| D2 | -7.66 | *P*＜0.001 | 0.920(↓) | 0.640** | retained |
| D3 | -6.57 | *P*＜0.001 | 0.922(↓) | 0.569** | retained |
| E1 | -4.71 | *P*＜0.001 | 0.923(↓) | 0.440** | retained |
| E2 | -8.30 | *P*＜0.001 | 0.921(↓) | 0.591** | retained |
| E3 | -8.58 | *P*＜0.001 | 0.920(↓) | 0.630** | retained |
| E4 | -4.73 | *P*＜0.001 | 0.924(↓) | 0.419** | retained |

Note: **represented *P* <0.001, *represented *P* <0.05

| Item | Factor 1 | Factor 2 | Factor 3 | Factor 4 | Factor 5 |
| --- | --- | --- | --- | --- | --- |
| A1 | **0.657** | 0.282 | 0.406 | 0.151 | 0.224 |
| A2 | **0.804** | 0.146 | 0.186 | 0.007 | 0.112 |
| A3 | **0.786** | 0.034 | 0.107 | 0.109 | 0.250 |
| A4 | **0.627** | 0.347 | 0.212 | 0.243 | 0.296 |
| **B1** | 0.479 | -0.034 | 0.259 | 0.385 | 0.232 |
| B2 | 0.156 | 0.059 | **0.751** | 0.184 | 0.222 |
| B3 | 0.252 | 0.251 | **0.791** | 0.092 | 0.022 |
| B4 | 0.337 | 0.198 | **0.653** | 0.142 | 0.268 |
| B5 | 0.045 | 0.018 | **0.692** | 0.342 | -0.064 |
| **B6** | 0.226 | **0.795** | 0.056 | -0.003 | -0.087 |
| **B7** | 0.364 | -0.086 | 0.249 | 0.221 | **0.522** |
| **B8** | 0.081 | -0.217 | 0.427 | -0.077 | 0.288 |
| C1 | 0.087 | **0.820** | 0.049 | 0.219 | 0.166 |
| **C2** | 0.122 | 0.376 | 0.361 | 0.383 | 0.320 |
| C3 | 0.032 | **0.621** | 0.156 | 0.103 | 0.394 |
| **C4** | **0.510** | 0.254 | 0.202 | **0.491** | 0.275 |
| C5 | 0.120 | **0.729** | 0.078 | 0.139 | 0.301 |
| D1 | 0.282 | 0.252 | 0.097 | 0.317 | **0.574** |
| D2 | 0.328 | 0.265 | 0.043 | 0.258 | **0.584** |
| D3 | 0.161 | 0.263 | 0.172 | -0.015 | **0.683** |
| E1 | -0.002 | -0.017 | 0.327 | **0.603** | 0.264 |
| E2 | 0.140 | 0.176 | 0.375 | **0.631** | 0.060 |
| E3 | 0.304 | 0.344 | -0.009 | **0.717** | 0.090 |
| **E4** | 0.425 | 0.411 | -0.086 | 0.362 | -0.173 |
| Eigenvalues | 8.95 | 2.26 | 1.49 | 1.19 | 1.1 |
| Explained variance (%) | 37.3 | 9.4 | 6.22 | 4.94 | 4.57 |
| Cumulative explained variance (%) | 37.3 | 46.7 | 52.92 | 57.86 | 62.43 |

**Table S2 Factor loadings of first EFA**

Note: items with unreasonable factor loadings were removed (B1, B6, B7, B8, C2, C4, E4)


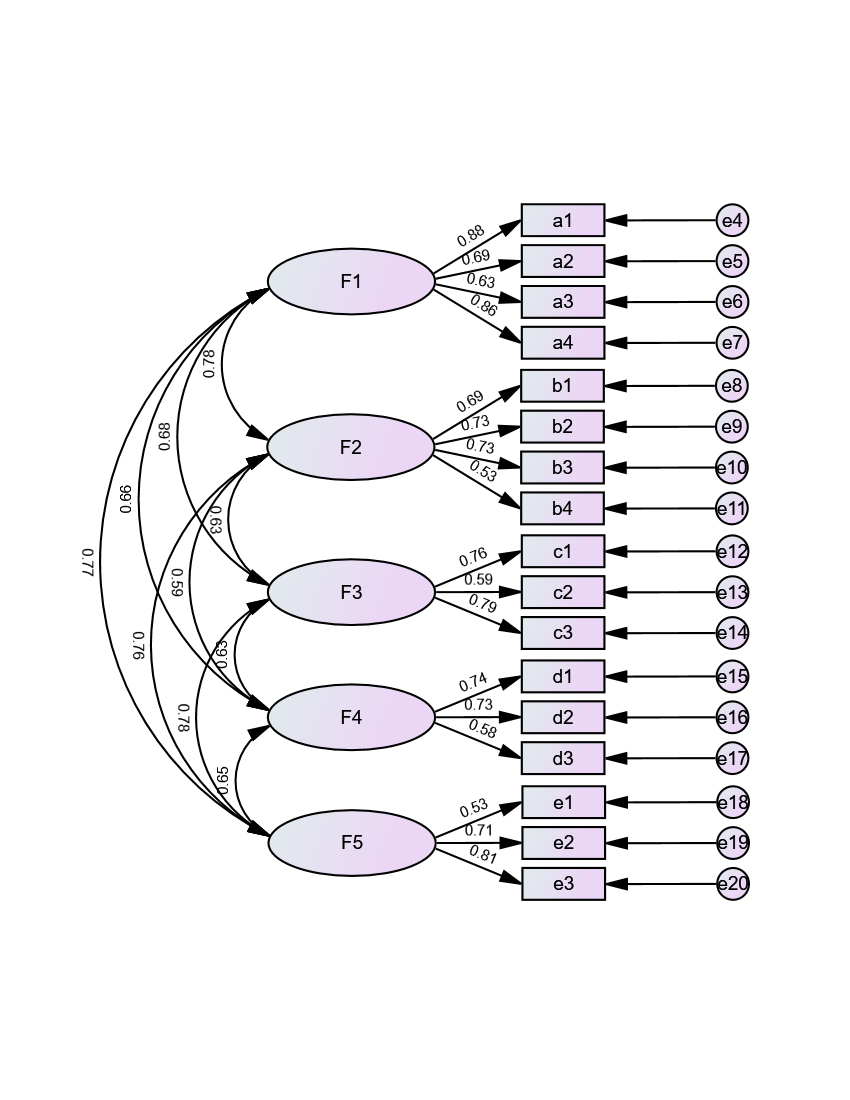


**Figure S1 Model Fit of the CFA**

**Pulmonary Rehabilitation Kinesiophobia Scale for Patients with COPD**

Please tick (√) the box that best describes your situation. Be sure to only select one response for each question.

| Item | Strongly Disagree | Disagree | Neutral | Agree | Strongly Disagree |
| --- | --- | --- | --- | --- | --- |
| 1 | 2 | 3 | 4 | 5 |
| 1: I avoid exercise for fear of shortness of breath |  |  |  |  |  |
| 2: I worry about coughing while exercising |  |  |  |  |  |
| 3: I worry about falling or injuring myself while exercising |  |  |  |  |  |
| 4: I worry that my condition will worsen after exercise |  |  |  |  |  |
| 5: I usually can’t walk fast during walking exercise |  |  |  |  |  |
| 6: I have difficulty with strength training |  |  |  |  |  |
| 7: I get out of breath with slight exertion in daily life |  |  |  |  |  |
| 8: Shortness of breath during exercise means I need a break |  |  |  |  |  |
| 9 Exercise is enjoyable for me |  |  |  |  |  |
| 10: Exercise no longer helps with my illness |  |  |  |  |  |
| 11: I’m confident that consistent exercise will improve my physical condition |  |  |  |  |  |
| 12: I’m worried about exercising without family or friends around |  |  |  |  |  |
| 13: I am concerned about exercising without guidance from a healthcare professional |  |  |  |  |  |
| 14: I lack appropriate venues for physical exercise |  |  |  |  |  |
| 15: I will avoid activities or movements that cause shortness of breath as much as possible |  |  |  |  |  |
| 16: Rest is the best I can do for now |  |  |  |  |  |
| 17: I should rest properly instead of exercising |  |  |  |  |  |

*Note:* Item 9 and Item 11 are reverse scored.

| □ Grade 0 I only get breathless with strenuous exercise |
| --- |
| □ Grade 1 I get short of breath when hurrying on the level or walking up a slight hill |
| □ Grade 2 I walk slower than people of the same age on the level because of breathlessness, or I have to stop for breath when walking on my own pace on the level |
| □ Grade 3 I stop for breath after walking about 100 meters or after a few minutes on the level |
| □ Grade 4 I am too breathless to leave the house or I am breathless when dressing or undressing |

**Modified Medical Research Council Dyspnea Scale (mMRC)**

please tick in the box that applies to you | one box only | grades 0 - 4

| I never cough | □0 □1 □2 □3 □4 □5 | I cough all the time |
| --- | --- | --- |
| I have no phlegm (mucus) in my chest at all | □0 □1 □2 □3 □4 □5 | My chest is completely full of phlegm (mucus) |
| My chest does not feel tight at all | □0 □1 □2 □3 □4 □5 | My chest feels very tight |
| When I walk up a hill or one flight of stairs I am not breathless | □0 □1 □2 □3 □4 □5 | When I walk up a hill or one flight of stairs I am very breathless |
| I am not limited doing any activities at home | □0 □1 □2 □3 □4 □5 | I am very limited doing activities at home |
| I am confident leaving my home despite my lung condition | □0 □1 □2 □3 □4 □5 | I am not at all confident leaving my home because of my lung condition |
| I sleep soundly | □0 □1 □2 □3 □4 □5 | I don't sleep soundly because of my lung condition |
| I have lots of energy | □0 □1 □2 □3 □4 □5 | I have no energy at all |

**COPD Assessment Test**

For each item below, place a mark (√) in the box that best describes you currently. Be sure to only select one response for each question.
